# Supplementary material
Source: HighWire-hosted journal article supplement (https://erj.ersjournals.com/highwire/filestream/114476/field_highwire_adjunct_files/0/ERJ_Revision_Online_Supplementv2.pdf)

**Disease Progression in Young Patients with COPD: Rethinking the Fletcher And Peto's model.**

Pablo Sanchez-Salcedo, Miguel Divo, Ciro Casanova, Victor Pinto-Plata, Juan P. de-Torres, Claudia Cote, Carlos Cabrera, Jorge Zagaceta, Roberto Rodriguez-Roisin, Javier J. Zulueta, Jose Maria Marin, Bartolome Celli.

**ONLINE DATA SUPPLEMENT.**

The baseline clinical characteristics of the patients with at least 3 measurements included in the study (columns B) were similar to that of the patients with 2 spirometries (columns A). The only difference was the time of follow-up, which was longer in the younger group compared with the older patients.

In general, there were no significant differences in disease progression when stratified by BODE quartiles. No particular pattern was noted. As observed for lung function progression (Figure 2, Panel A), the BODE score also showed a heterogeneous distribution, independent of age.

**Table E1.**

**Differences in baseline characteristics between subjects with two (A) and at least three clinical assessments (B), stratified by age of presentation.**

| Variable          | Younger COPD  |                |            | Older COPD     |                |            |
|-------------------|---------------|----------------|------------|----------------|----------------|------------|
|                   | A<br>(n = 36) | B<br>(n = 103) | p<br>value | A<br>(n = 167) | B<br>(n = 463) | p<br>value |
| Age               | 51 ± 4        | 50 ± 4         | 0.3        | 72 ± 6         | 72 ± 5         | 0.6        |
| Male, %           | 86            | 85             | 0.9        | 88             | 92             | 0.08       |
| Follow up (mo)    | 22 (14-50)    | 62 (42-98)     | <0.001     | 22 (14-36)     | 50 (36-69)     | <0.001     |
| Survival, %       | 72            | 90             | <0.01      | 45             | 65             | <0.001     |
| Active smoker, %  | 54            | 59             | 0.6        | 29             | 20             | 0.05       |
| FEV1, % predicted | 52 ± 22       | 53 ± 24        | 0.9        | 49 ± 21        | 48 ± 20        | 0.9        |
| GOLD1, %          | 11            | 18             | 0.3        | 10             | 8              | 0.3        |
| GOLD2, %          | 44            | 28             | 0.07       | 32             | 35             | 0.5        |
| GOLD3, %          | 31            | 37             | 0.5        | 40             | 41             | 0.9        |
| GOLD4, %          | 14            | 17             | 0.6        | 17             | 16             | 0.8        |
| Assessments *     | 2 (2-2)       | 4 (3-6)        | <0.001     | 2 (2-2)        | 4 (3-5)        | <0.001     |
| BODE index        | 4.2 ± 3       | 3.4 ± 2        | 0.3        | 4.6 ± 3        | 4.1 ± 2        | 0.06       |
| Quartile 1, %     | 31            | 31             | 0.8        | 25             | 28             | 0.5        |
| Quartile 2, %     | 31            | 39             | 0.4        | 27             | 30             | 0.4        |
| Quartile 3, %     | 17            | 20             | 0.9        | 20             | 25             | 0.2        |
| Quartile 4, %     | 21            | 10             | 0.1        | 28             | 17             | 0.003      |

FEV1: Forced expiratory volume in one second. Values are expressed as mean ± SD, except stated otherwise: \* median (interquartile range).

**Table E2.****Differences in baseline clinical data and disease progression between the two study groups, stratified by BODE quartiles.****A. Baseline characteristics**

|                 | Quartile 1 |         |         | Quartile 2 |         |         | Quartile 3 |         |         | Quartile 4 |         |         |
|-----------------|------------|---------|---------|------------|---------|---------|------------|---------|---------|------------|---------|---------|
|                 | Younger    | Older   | p value |
| FEV1% predicted | 69 (14)    | 66 (18) | 0.22    | 39 (9)     | 46 (14) | 0.001   | 30 (8)     | 40 ± 11 | <0.001  | 26 (8)     | 29 (10) | 0.15    |
| BODE index      | 10 (1)     | 1.2 (1) | 0.14    | 3.5 (1)    | 3.5 (1) | 0.8     | 5.3 (0.5)  | 5.5 ± 1 | 0.13    | 7.1 (0.4)  | 8 (1)   | <0.001  |

**B. Mean annual change in FEV and BODE index.**

|                       | Quartile 1 |           |         | Quartile 2 |           |         | Quartile 3 |           |         | Quartile 4 |            |         |
|-----------------------|------------|-----------|---------|------------|-----------|---------|------------|-----------|---------|------------|------------|---------|
|                       | Younger    | Older     | p value | Younger    | Older     | p value | Younger    | Older     | p value | Younger    | Older      | p value |
| FEV1 (ml/yr)          | -83 (125)  | -55 (112) | 0.15    | -37 (78)   | -31 (92)  | 0.35    | -11 (59)   | -43 (11)  | 0.03    | -54 (56)   | -38 (90)   | 0.25    |
| BODE index (units/yr) | 0.2 (0.4)  | 0.3 (0.5) | 0.24    | 0.2 (0.5)  | 0.2 (0.6) | 0.92    | -0.1 (0.5) | 0.3 (0.7) | 0.01    | 0.3 (0.5)  | 0.05 (0.5) | 0.11    |

Stratification done by BODE quartiles: Quartile 1: 0-2; Quartile 2: 3-4, Quartile 3: 5-6; Quartile 4: 7-10. FEV1: forced expiratory volume in one second. Values are expressed as mean (SD).

**Figure E1.** Mean annual change in BODE score (units/year) for younger and older COPD.

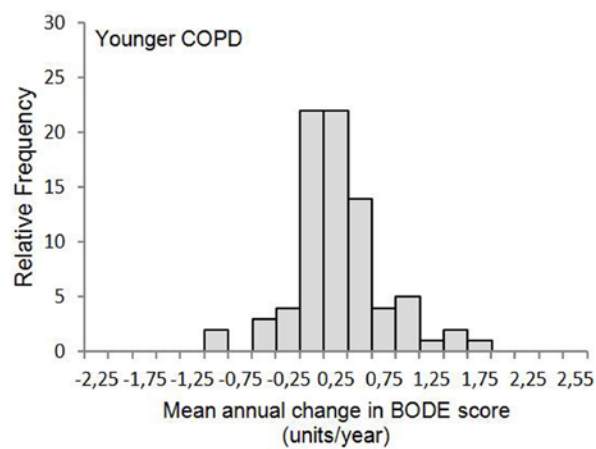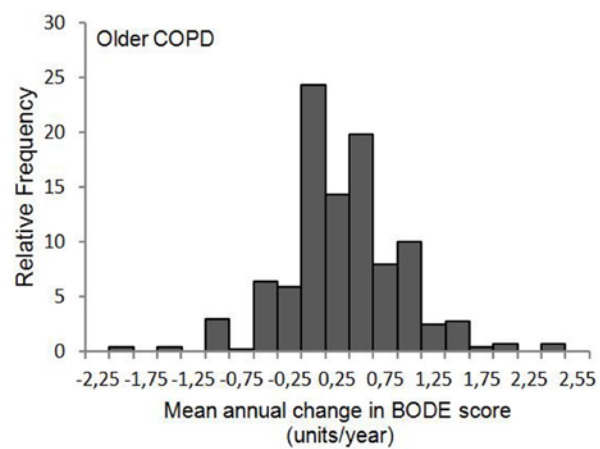

Supplement: ERJ_Revision_Online_Supplementv2.pdf [file ERJ_Revision_Online_Supplementv2.pdf]
